# Supplementary material
Source: ML conference proceedings conference paper supplement (https://proceedings.mlr.press/v139/yan21c.html)
Supplement: Supplementary file 1 [file yan21c-supp.zip]

Archive with 81 entries (58 files):
- supp/
- supp/code/
- supp/code/preprocessing/
- supp/code/preprocessing/data_generate_oo.py
- supp/code/preprocessing/gen_json_oo_test.py
- supp/code/preprocessing/genotypes.py
- supp/code/preprocessing/gen_json.py
- supp/code/preprocessing/gen_json_oo_train.py
- supp/code/preprocessing/data_generate.py
- supp/code/preprocessing/gen_json_darts.py
- supp/code/utils/
- supp/code/utils/IO.py
- supp/code/utils/__init__.py
- supp/code/utils/utils.py
- supp/code/run_scripts/
- supp/code/run_scripts/run_search_nasbench101.sh
- supp/code/run_scripts/run_search_nasbench301.sh
- supp/code/run_scripts/pretrain_nasbench101.sh
- supp/code/run_scripts/generate_oo.sh
- supp/code/run_scripts/pretrain_nasbench301.sh
- supp/code/parameterLoader.py
- supp/code/data_process/
- supp/code/data_process/__init__.py
- supp/code/data_process/dataLoader.py
- supp/code/layers/
- supp/code/layers/__init__.py
- supp/code/layers/graphEncoder.py
- supp/code/layers/transformer.py
- supp/code/layers/loss.py
- supp/code/pybnn/
- supp/code/pybnn/base_model.py
- supp/code/pybnn/util/
- supp/code/pybnn/util/__init__.py
- supp/code/pybnn/util/normalization.py
- supp/code/pybnn/dngo.py
- supp/code/pybnn/bayesian_linear_regression.py
- supp/code/model/
- supp/code/model/.gitignore
- supp/code/README.md
- supp/code/search_methods/
- supp/code/search_methods/oo_mlp.py
- supp/code/search_methods/dngo_ls_nasbench301.py
- supp/code/search_methods/dngo_ls_nasbench101.py
- supp/code/search_methods/__init__.py
- supp/code/search_methods/dngo_ls_darts.py
- supp/code/mylog/
- supp/code/mylog/mylog.py
- supp/code/mylog/__init__.py
- supp/code/darts/
- supp/code/darts/cnn/
- supp/code/darts/cnn/architect.py
- supp/code/darts/cnn/operations.py
- supp/code/darts/cnn/train.py
- supp/code/darts/cnn/genotypes.py
- supp/code/darts/cnn/test_imagenet.py
- supp/code/darts/cnn/utils.py
- supp/code/darts/cnn/test.py
- supp/code/darts/cnn/visualize.py
- supp/code/darts/cnn/model.py
- supp/code/darts/cnn/train_imagenet.py
- supp/code/darts/cnn/train_search.py
- supp/code/.gitignore
- supp/code/inference/
- supp/code/inference/inference_adj.py
- supp/code/inference/inference.py
- supp/code/log/
- supp/code/log/.gitignore
- supp/code/run.py
- supp/code/requirements.txt
- supp/code/docs/
- supp/code/docs/cate_img.png
- supp/code/data/
- supp/code/data/nasbench301/
- supp/code/data/oo/
- supp/code/data/nasbench101/
- supp/code/data/darts/
- supp/code/LICENSE
- supp/code/parallel/
- supp/code/parallel/__init__.py
- supp/code/parallel/parallel.py
- supp/supp.pdf
