# Supplementary material
Source: ML conference proceedings conference paper supplement (https://proceedings.mlr.press/v139/yan21c.html)
Supplement: Supplementary file 1 [file yan21c-supp.zip › supp/code/darts/cnn/genotypes.py]

from collections import namedtuple

Genotype = namedtuple('Genotype', 'normal normal_concat reduce reduce_concat')

PRIMITIVES = [
    'none',
    'max_pool_3x3',
    'avg_pool_3x3',
    'skip_connect',
    'sep_conv_3x3',
    'sep_conv_5x5',
    'dil_conv_3x3',
    'dil_conv_5x5'
]

NASNet = Genotype(
  normal = [
    ('sep_conv_5x5', 1),
    ('sep_conv_3x3', 0),
    ('sep_conv_5x5', 0),
    ('sep_conv_3x3', 0),
    ('avg_pool_3x3', 1),
    ('skip_connect', 0),
    ('avg_pool_3x3', 0),
    ('avg_pool_3x3', 0),
    ('sep_conv_3x3', 1),
    ('skip_connect', 1),
  ],
  normal_concat = [2, 3, 4, 5, 6],
  reduce = [
    ('sep_conv_5x5', 1),
    ('sep_conv_7x7', 0),
    ('max_pool_3x3', 1),
    ('sep_conv_7x7', 0),
    ('avg_pool_3x3', 1),
    ('sep_conv_5x5', 0),
    ('skip_connect', 3),
    ('avg_pool_3x3', 2),
    ('sep_conv_3x3', 2),
    ('max_pool_3x3', 1),
  ],
  reduce_concat = [4, 5, 6],
)

AmoebaNet = Genotype(
  normal = [
    ('avg_pool_3x3', 0),
    ('max_pool_3x3', 1),
    ('sep_conv_3x3', 0),
    ('sep_conv_5x5', 2),
    ('sep_conv_3x3', 0),
    ('avg_pool_3x3', 3),
    ('sep_conv_3x3', 1),
    ('skip_connect', 1),
    ('skip_connect', 0),
    ('avg_pool_3x3', 1),
    ],
  normal_concat = [4, 5, 6],
  reduce = [
    ('avg_pool_3x3', 0),
    ('sep_conv_3x3', 1),
    ('max_pool_3x3', 0),
    ('sep_conv_7x7', 2),
    ('sep_conv_7x7', 0),
    ('avg_pool_3x3', 1),
    ('max_pool_3x3', 0),
    ('max_pool_3x3', 1),
    ('conv_7x1_1x7', 0),
    ('sep_conv_3x3', 5),
  ],
  reduce_concat = [3, 4, 6]
)

DARTS = Genotype(normal=[('sep_conv_3x3', 0), ('sep_conv_3x3', 1), ('sep_conv_3x3', 0), ('sep_conv_3x3', 1), ('sep_conv_3x3', 1), ('skip_connect', 0), ('skip_connect', 0), ('dil_conv_3x3', 2)], normal_concat=[2, 3, 4, 5], reduce=[('max_pool_3x3', 0), ('max_pool_3x3', 1), ('skip_connect', 2), ('max_pool_3x3', 1), ('max_pool_3x3', 0), ('skip_connect', 2), ('skip_connect', 2), ('max_pool_3x3', 1)], reduce_concat=[2, 3, 4, 5])
arch2vec_bo = Genotype(normal=[('sep_conv_5x5', 1), ('max_pool_3x3', 0), ('skip_connect', 0), ('dil_conv_3x3', 1), ('sep_conv_5x5', 1), ('sep_conv_3x3', 0), ('dil_conv_5x5', 2), ('sep_conv_3x3', 0)], normal_concat=[2, 3, 4, 5], reduce=[('sep_conv_5x5', 1), ('max_pool_3x3', 0), ('skip_connect', 0), ('dil_conv_3x3', 1), ('sep_conv_5x5', 1), ('sep_conv_3x3', 0), ('dil_conv_5x5', 2), ('sep_conv_3x3', 0)], reduce_concat=[2, 3, 4, 5])
BANANAS = Genotype(normal=[('sep_conv_3x3', 1), ('skip_connect', 0), ('sep_conv_5x5', 2), ('sep_conv_5x5', 0), ('skip_connect', 0), ('sep_conv_5x5', 2), ('sep_conv_3x3', 0), ('skip_connect', 2)], normal_concat=[2, 3, 4, 5], reduce=[('sep_conv_3x3', 1), ('max_pool_3x3', 0), ('max_pool_3x3', 0), ('none', 1), ('dil_conv_3x3', 2), ('sep_conv_5x5', 3), ('sep_conv_5x5', 4), ('sep_conv_3x3', 1)], reduce_concat=[2, 3, 4, 5])

"""2.55%, 3.47M, obtained from 44-th iterations"""
cate_small = Genotype(normal=[('max_pool_3x3', 0), ('sep_conv_3x3', 0), ('skip_connect', 1), ('sep_conv_3x3', 1), ('sep_conv_3x3', 2), ('sep_conv_3x3', 0), ('dil_conv_3x3', 4), ('dil_conv_3x3', 2)], normal_concat=[2, 3, 4, 5], reduce=[('max_pool_3x3', 0), ('sep_conv_3x3', 0), ('skip_connect', 1), ('sep_conv_3x3', 1), ('sep_conv_3x3', 2), ('sep_conv_3x3', 0), ('dil_conv_3x3', 4), ('dil_conv_3x3', 2)], reduce_concat=[2, 3, 4, 5])

"""2.46%, 4.1M, obtained from 223-th iterations"""
cate_large = Genotype(normal=[('sep_conv_3x3', 1), ('skip_connect', 0), ('dil_conv_3x3', 2), ('sep_conv_3x3', 0), ('sep_conv_3x3', 2), ('sep_conv_3x3', 1), ('sep_conv_3x3', 1), ('sep_conv_3x3', 3)], normal_concat=[2, 3, 4, 5], reduce=[('sep_conv_3x3', 1), ('skip_connect', 0), ('dil_conv_3x3', 2), ('sep_conv_3x3', 0), ('sep_conv_3x3', 2), ('sep_conv_3x3', 1), ('sep_conv_3x3', 1), ('sep_conv_3x3', 3)], reduce_concat=[2, 3, 4, 5])
