# Supplementary material
Source: ML conference proceedings conference paper supplement (https://proceedings.mlr.press/v139/yan21c.html)
Supplement: Supplementary file 1 [file yan21c-supp.zip › supp/code/darts/cnn/train.py]

import os
import sys
sys.path.insert(0, os.getcwd())
import time
import glob
import numpy as np
import random
import torch
import darts.cnn.utils as utils
import logging
import argparse
import torch.nn as nn
import darts.cnn.genotypes as genotypes
import torch.utils
import torchvision.datasets as dset
import torch.backends.cudnn as cudnn
from collections import namedtuple

from darts.cnn.model import NetworkCIFAR as Network


parser = argparse.ArgumentParser("cifar")
parser.add_argument('--data', type=str, default='./data', help='location of the data corpus')
parser.add_argument('--batch_size', type=int, default=96, help='batch size')
parser.add_argument('--learning_rate', type=float, default=0.025, help='init learning rate')
parser.add_argument('--momentum', type=float, default=0.9, help='momentum')
parser.add_argument('--weight_decay', type=float, default=3e-4, help='weight decay')
parser.add_argument('--report_freq', type=float, default=500, help='report frequency')
parser.add_argument('--gpu', type=int, default=0, help='gpu device id')
parser.add_argument('--epochs', type=int, default=600, help='num of training epochs')
parser.add_argument('--init_channels', type=int, default=36, help='num of init channels')
parser.add_argument('--layers', type=int, default=20, help='total number of layers')
parser.add_argument('--model_path', type=str, default='saved_models', help='path to save the model')
parser.add_argument('--auxiliary', action='store_true', default=False, help='use auxiliary tower')
parser.add_argument('--auxiliary_weight', type=float, default=0.4, help='weight for auxiliary loss')
parser.add_argument('--cutout', action='store_true', default=False, help='use cutout')
parser.add_argument('--cutout_length', type=int, default=16, help='cutout length')
parser.add_argument('--drop_path_prob', type=float, default=0.2, help='drop path probability')
parser.add_argument('--save', type=str, default='EXP', help='experiment name')
parser.add_argument('--seed', type=int, default=3, help='random seed')
parser.add_argument('--arch', type=str, default='DARTS', help='which architecture to use')
parser.add_argument('--grad_clip', type=float, default=5, help='gradient clipping')
args = parser.parse_args()

args.save = 'eval-{}-{}'.format(args.save, time.strftime("%Y%m%d-%H%M%S"))
utils.create_exp_dir(args.save, scripts_to_save=glob.glob('*.py'))

log_format = '%(asctime)s %(message)s'
logging.basicConfig(stream=sys.stdout, level=logging.INFO,
    format=log_format, datefmt='%m/%d %I:%M:%S %p')
fh = logging.FileHandler(os.path.join(args.save, 'log.txt'))
fh.setFormatter(logging.Formatter(log_format))
logging.getLogger().addHandler(fh)

CIFAR_CLASSES = 10


def main():

  np.random.seed(args.seed)
  random.seed(args.seed)

  if torch.cuda.is_available():
    device = torch.device('cuda:{}'.format(args.gpu))
    cudnn.benchmark = False
    torch.manual_seed(args.seed)
    cudnn.enabled = True
    cudnn.deterministic = True
    torch.cuda.manual_seed(args.seed)
    logging.info('gpu device = %d' % args.gpu)
  else:
    device = torch.device('cpu')
    logging.info('No gpu device available')
    torch.manual_seed(args.seed)

  logging.info("args = %s", args)
  genotype = eval("genotypes.%s" % args.arch)
  logging.info("genotype: {}".format(genotype))

  model = Network(args.init_channels, CIFAR_CLASSES, args.layers, args.auxiliary, genotype)
  model = model.to(device)

  logging.info("param size = %fMB", utils.count_parameters_in_MB(model))
  total_params = sum(x.data.nelement() for x in model.parameters())
  logging.info('Model total parameters: {}'.format(total_params))

  criterion = nn.CrossEntropyLoss()
  criterion = criterion.cuda()
  optimizer = torch.optim.SGD(
      model.parameters(),
      args.learning_rate,
      momentum=args.momentum,
      weight_decay=args.weight_decay
      )

  train_transform, valid_transform = utils._data_transforms_cifar10(args.cutout, args.cutout_length)
  train_data = dset.CIFAR10(root=args.data, train=True, download=True, transform=train_transform)
  valid_data = dset.CIFAR10(root=args.data, train=False, download=True, transform=valid_transform)

  train_queue = torch.utils.data.DataLoader(
      train_data, batch_size=args.batch_size, shuffle=True, pin_memory=True, num_workers=4)

  valid_queue = torch.utils.data.DataLoader(
      valid_data, batch_size=args.batch_size*4, shuffle=False, pin_memory=True, num_workers=4)

  scheduler = torch.optim.lr_scheduler.CosineAnnealingLR(optimizer, float(args.epochs))

  for epoch in range(args.epochs):

    logging.info('epoch %d lr %e', epoch, scheduler.get_lr()[0])
    model.drop_path_prob = args.drop_path_prob * epoch / args.epochs

    train_acc, train_obj = train(train_queue, model, criterion, optimizer, args.gpu)
    logging.info('train_acc %f', train_acc)

    valid_acc, valid_obj = infer(valid_queue, model, criterion, args.gpu)
    logging.info('valid_acc %f', valid_acc)

    scheduler.step()

    utils.save(model, os.path.join(args.save, 'weights.pt'))


def train(train_queue, model, criterion, optimizer, gpu_id=0):
  objs = utils.AvgrageMeter()
  top1 = utils.AvgrageMeter()
  top5 = utils.AvgrageMeter()
  model.train()

  device = torch.device('cuda:{}'.format(gpu_id) if torch.cuda.is_available() \
    else 'cpu')


  for step, (input, target) in enumerate(train_queue):
    input = input.to(device)
    target = target.to(device)

    optimizer.zero_grad()
    logits, logits_aux = model(input)
    loss = criterion(logits, target)
    if args.auxiliary:
      loss_aux = criterion(logits_aux, target)
      loss += args.auxiliary_weight*loss_aux
    loss.backward()
    nn.utils.clip_grad_norm_(model.parameters(), args.grad_clip)
    optimizer.step()

    prec1, prec5 = utils.accuracy(logits, target, topk=(1, 5))
    n = input.size(0)
    objs.update(loss.item(), n)
    top1.update(prec1.item(), n)
    top5.update(prec5.item(), n) 

    if step % args.report_freq == 0:
      logging.info('train %03d %e %f %f', step, objs.avg, top1.avg, top5.avg)

  return top1.avg, objs.avg


def infer(valid_queue, model, criterion, gpu_id=0):
  with torch.no_grad():
    objs = utils.AvgrageMeter()
    top1 = utils.AvgrageMeter()
    top5 = utils.AvgrageMeter()
    model.eval()

    device = torch.device('cuda:{}'.format(gpu_id) if torch.cuda.is_available() \
      else 'cpu')

    for step, (input, target) in enumerate(valid_queue):
      input = input.to(device)
      target = target.to(device)

      logits, _ = model(input)
      loss = criterion(logits, target)

      prec1, prec5 = utils.accuracy(logits, target, topk=(1, 5))
      n = input.size(0)
      objs.update(loss.item(), n)
      top1.update(prec1.item(), n)
      top5.update(prec5.item(), n)

      if step % args.report_freq == 0:
        logging.info('valid %03d %e %f %f', step, objs.avg, top1.avg, top5.avg)

  return top1.avg, objs.avg


if __name__ == '__main__':
  main()
