# Supplementary material
Source: ML conference proceedings conference paper supplement (https://proceedings.mlr.press/v139/yan21c.html)
Supplement: Supplementary file 1 [file yan21c-supp.zip › supp/code/darts/cnn/train_imagenet.py]

import os
import sys
sys.path.insert(0, os.getcwd())
import numpy as np
import time
import torch
import darts.cnn.utils as utils
import glob
import random
import logging
import argparse
import torch.nn as nn
import darts.cnn.genotypes as genotypes
import torch.utils
import torchvision.datasets as dset
import torchvision.transforms as transforms
import torch.backends.cudnn as cudnn
from darts.cnn.model import NetworkImageNet as Network
from thop import profile


parser = argparse.ArgumentParser("imagenet")
parser.add_argument('--data', type=str, default='/mnt/ssd/data/imagenet/', help='location of the data corpus')
parser.add_argument('--batch_size', type=int, default=128, help='batch size')
parser.add_argument('--learning_rate', type=float, default=0.1, help='init learning rate')
parser.add_argument('--momentum', type=float, default=0.9, help='momentum')
parser.add_argument('--weight_decay', type=float, default=3e-5, help='weight decay')
parser.add_argument('--report_freq', type=float, default=100, help='report frequency')
parser.add_argument('--gpu', type=int, default=0, help='gpu device id')
parser.add_argument('--epochs', type=int, default=250, help='num of training epochs')
parser.add_argument('--init_channels', type=int, default=48, help='num of init channels')
parser.add_argument('--layers', type=int, default=14, help='total number of layers')
parser.add_argument('--auxiliary', action='store_true', default=False, help='use auxiliary tower')
parser.add_argument('--auxiliary_weight', type=float, default=0.4, help='weight for auxiliary loss')
parser.add_argument('--drop_path_prob', type=float, default=0, help='drop path probability')
parser.add_argument('--save', type=str, default='EXP', help='experiment name')
parser.add_argument('--seed', type=int, default=0, help='random seed')
parser.add_argument('--arch', type=str, default='DARTS', help='which architecture to use')
parser.add_argument('--grad_clip', type=float, default=5., help='gradient clipping')
parser.add_argument('--label_smooth', type=float, default=0.1, help='label smoothing')
parser.add_argument('--gamma', type=float, default=0.97, help='learning rate decay')
parser.add_argument('--decay_period', type=int, default=1, help='epochs between two learning rate decays')
parser.add_argument('--parallel', action='store_true', default=False, help='data parallelism')
args = parser.parse_args()

args.save = 'eval-{}-{}'.format(args.save, time.strftime("%Y%m%d-%H%M%S"))
utils.create_exp_dir(args.save, scripts_to_save=glob.glob('*.py'))

log_format = '%(asctime)s %(message)s'
logging.basicConfig(stream=sys.stdout, level=logging.INFO,
    format=log_format, datefmt='%m/%d %I:%M:%S %p')
fh = logging.FileHandler(os.path.join(args.save, 'log.txt'))
fh.setFormatter(logging.Formatter(log_format))
logging.getLogger().addHandler(fh)

CLASSES = 1000


class CrossEntropyLabelSmooth(nn.Module):

  def __init__(self, num_classes, epsilon):
    super(CrossEntropyLabelSmooth, self).__init__()
    self.num_classes = num_classes
    self.epsilon = epsilon
    self.logsoftmax = nn.LogSoftmax(dim=1)

  def forward(self, inputs, targets):
    log_probs = self.logsoftmax(inputs)
    targets = torch.zeros_like(log_probs).scatter_(1, targets.unsqueeze(1), 1)
    targets = (1 - self.epsilon) * targets + self.epsilon / self.num_classes
    loss = (-targets * log_probs).mean(0).sum()
    return loss


def main():
  if not torch.cuda.is_available():
    logging.info('no gpu device available')
    sys.exit(1)

  np.random.seed(args.seed)
  torch.cuda.set_device(args.gpu)
  cudnn.benchmark = True
  torch.manual_seed(args.seed)
  cudnn.enabled=True
  torch.cuda.manual_seed(args.seed)
  logging.info('gpu device = %d' % args.gpu)
  logging.info("args = %s", args)

  genotype = eval("genotypes.%s" % args.arch)
  model = Network(args.init_channels, CLASSES, args.layers, args.auxiliary, genotype)

  if args.parallel:
    model = nn.DataParallel(model).cuda()
  else:
    model = model.cuda()

  input = torch.randn(1,3,224,224).cuda()
  macs, params = profile(model, inputs=(input,))
  print('flops: {}, params: {}'.format(macs, params))
  print("param size = %fMB", utils.count_parameters_in_MB(model))

  logging.info("param size = %fMB", utils.count_parameters_in_MB(model))

  criterion = nn.CrossEntropyLoss()
  criterion = criterion.cuda()
  criterion_smooth = CrossEntropyLabelSmooth(CLASSES, args.label_smooth)
  criterion_smooth = criterion_smooth.cuda()

  optimizer = torch.optim.SGD(
    model.parameters(),
    args.learning_rate,
    momentum=args.momentum,
    weight_decay=args.weight_decay
    )

  traindir = os.path.join(args.data, 'train')
  validdir = os.path.join(args.data, 'val')
  normalize = transforms.Normalize(mean=[0.485, 0.456, 0.406], std=[0.229, 0.224, 0.225])
  train_data = dset.ImageFolder(
    traindir,
    transforms.Compose([
      transforms.RandomResizedCrop(224),
      transforms.RandomHorizontalFlip(),
      transforms.ColorJitter(
        brightness=0.4,
        contrast=0.4,
        saturation=0.4,
        hue=0.2),
      transforms.ToTensor(),
      normalize,
    ]))
  valid_data = dset.ImageFolder(
    validdir,
    transforms.Compose([
      transforms.Resize(256),
      transforms.CenterCrop(224),
      transforms.ToTensor(),
      normalize,
    ]))

  train_queue = torch.utils.data.DataLoader(
    train_data, batch_size=args.batch_size, shuffle=True, pin_memory=True, num_workers=4)

  valid_queue = torch.utils.data.DataLoader(
    valid_data, batch_size=args.batch_size, shuffle=False, pin_memory=True, num_workers=4)

  scheduler = torch.optim.lr_scheduler.StepLR(optimizer, args.decay_period, gamma=args.gamma)

  best_acc_top1 = 0
  for epoch in range(args.epochs):
    logging.info('epoch %d lr %e', epoch, scheduler.get_lr()[0])
    model.drop_path_prob = args.drop_path_prob * epoch / args.epochs

    train_acc, train_obj = train(train_queue, model, criterion_smooth, optimizer)
    logging.info('train_acc %f', train_acc)

    valid_acc_top1, valid_acc_top5, valid_obj = infer(valid_queue, model, criterion)
    logging.info('valid_acc_top1 %f', valid_acc_top1)
    logging.info('valid_acc_top5 %f', valid_acc_top5)

    is_best = False
    if valid_acc_top1 > best_acc_top1:
      best_acc_top1 = valid_acc_top1
      is_best = True

    utils.save_checkpoint({
      'epoch': epoch + 1,
      'state_dict': model.state_dict(),
      'best_acc_top1': best_acc_top1,
      'optimizer' : optimizer.state_dict(),
      }, is_best, args.save)

    scheduler.step()


def train(train_queue, model, criterion, optimizer):
  objs = utils.AvgrageMeter()
  top1 = utils.AvgrageMeter()
  top5 = utils.AvgrageMeter()
  model.train()

  for step, (input, target) in enumerate(train_queue):
    target = target.cuda()
    input = input.cuda()

    optimizer.zero_grad()
    logits, logits_aux = model(input)
    loss = criterion(logits, target)
    if args.auxiliary:
      loss_aux = criterion(logits_aux, target)
      loss += args.auxiliary_weight*loss_aux

    loss.backward()
    nn.utils.clip_grad_norm_(model.parameters(), args.grad_clip)
    optimizer.step()

    prec1, prec5 = utils.accuracy(logits, target, topk=(1, 5))
    n = input.size(0)
    objs.update(loss.item(), n)
    top1.update(prec1.item(), n)
    top5.update(prec5.item(), n)

    if step % args.report_freq == 0:
      logging.info('train %03d %e %f %f', step, objs.avg, top1.avg, top5.avg)

  return top1.avg, objs.avg


def infer(valid_queue, model, criterion):
  objs = utils.AvgrageMeter()
  top1 = utils.AvgrageMeter()
  top5 = utils.AvgrageMeter()
  model.eval()

  for step, (input, target) in enumerate(valid_queue):
    with torch.no_grad():
      input = input.cuda()
      target = target.cuda()

      logits, _ = model(input)
      loss = criterion(logits, target)

      prec1, prec5 = utils.accuracy(logits, target, topk=(1, 5))
      n = input.size(0)
      objs.update(loss.item(), n)
      top1.update(prec1.item(), n)
      top5.update(prec5.item(), n)

      if step % args.report_freq == 0:
        logging.info('valid %03d %e %f %f', step, objs.avg, top1.avg, top5.avg)

  return top1.avg, top5.avg, objs.avg


if __name__ == '__main__':
  main() 
