# Supplementary material
Source: ML conference proceedings conference paper supplement (https://proceedings.mlr.press/v139/yan21c.html)
Supplement: Supplementary file 1 [file yan21c-supp.zip › supp/code/darts/cnn/train_search.py]

import os
import sys
sys.path.insert(0, os.getcwd())
import time
import glob
import numpy as np
import random
import torch
import darts.cnn.utils as utils
import logging
import torch.nn as nn
import darts.cnn.genotypes
import torch.utils
import torchvision.datasets as dset
import torch.backends.cudnn as cudnn
from collections import namedtuple

from darts.cnn.model import NetworkCIFAR as Network

class Train:

  def __init__(self):

    self.data='./data'
    self.batch_size= 96
    self.learning_rate= 0.025
    self.momentum= 0.9
    self.weight_decay = 3e-4
    self.load_weights = 0
    self.report_freq = 500
    self.gpu = 0
    self.epochs = 50
    self.init_channels = 32
    self.layers = 8
    self.auxiliary  = True
    self.auxiliary_weight = 0.4
    self.cutout = True
    self.cutout_length = 16
    self.drop_path_prob = 0.2
    self.save = 'EXP'
    self.seed = 0
    self.grad_clip = 5
    self.train_portion = 0.9
    self.validation_set = True
    self.CIFAR_CLASSES = 10
    self.count = 1

  def main(self, seed, arch, epochs=50, gpu=0, load_weights=False, train_portion=0.9, save='model_search'):

    # Set up save file and logging
    self.save = save
    self.save = '{}'.format(self.save)
    if not os.path.exists(self.save):
      utils.create_exp_dir(self.save, scripts_to_save=glob.glob('*.py'))
      log_format = '%(asctime)s %(message)s'
      logging.basicConfig(stream=sys.stdout, level=logging.INFO,
          format=log_format, datefmt='%m/%d %I:%M:%S %p')
      fh = logging.FileHandler(os.path.join(self.save, 'log-seed{}.txt'.format(seed)))
      fh.setFormatter(logging.Formatter(log_format))
      logging.getLogger().addHandler(fh)
    else:
      log_format = '%(asctime)s %(message)s'
      logging.basicConfig(stream=sys.stdout, level=logging.INFO,
                          format=log_format, datefmt='%m/%d %I:%M:%S %p')
      fh = logging.FileHandler(os.path.join(self.save, 'log-seed{}.txt'.format(seed)))
      fh.setFormatter(logging.Formatter(log_format))
      logging.getLogger().addHandler(fh)

    self.arch = arch
    self.epochs = epochs
    self.load_weights = load_weights
    self.gpu = gpu
    self.train_portion = train_portion
    if self.train_portion == 1:
      self.validation_set = False
    self.seed = seed

    # cpu-gpu switch
    if not torch.cuda.is_available():
      torch.manual_seed(self.seed)
      device = torch.device('cpu')

    else:        
      torch.cuda.manual_seed_all(self.seed)
      random.seed(self.seed)
      torch.manual_seed(self.seed)
      device = torch.device(self.gpu)
      cudnn.benchmark = False
      cudnn.enabled=True
      cudnn.deterministic=True

    genotype = arch
    logging.info('counter: {} genotypes: {}'.format(self.count, genotype))
    model = Network(self.init_channels, self.CIFAR_CLASSES, self.layers, self.auxiliary, genotype)
    model = model.to(device)

    logging.info("param size = %fMB", utils.count_parameters_in_MB(model))
    total_params = sum(x.data.nelement() for x in model.parameters())
    logging.info('Model total parameters: {}'.format(total_params))

    criterion = nn.CrossEntropyLoss()
    criterion = criterion.to(device)
    optimizer = torch.optim.SGD(
        model.parameters(),
        self.learning_rate,
        momentum=self.momentum,
        weight_decay=self.weight_decay
        )

    train_transform, test_transform = utils._data_transforms_cifar10(self.cutout, self.cutout_length)
    train_data = dset.CIFAR10(root=self.data, train=True, transform=train_transform)
    test_data = dset.CIFAR10(root=self.data, train=False, transform=test_transform)

    num_train = len(train_data)
    indices = list(range(num_train))
    if self.validation_set:
      split = int(np.floor(self.train_portion * num_train))
    else:
      split = num_train

    train_queue = torch.utils.data.DataLoader(
        train_data, batch_size=self.batch_size,
        sampler=torch.utils.data.sampler.SubsetRandomSampler(indices[:split]),
        pin_memory=True, num_workers=4)

    if self.validation_set:
      valid_queue = torch.utils.data.DataLoader(
          train_data, batch_size=self.batch_size,
          sampler=torch.utils.data.sampler.SubsetRandomSampler(indices[split:num_train]),
          pin_memory=True, num_workers=4)

    test_queue = torch.utils.data.DataLoader(
        test_data, batch_size=self.batch_size, shuffle=False, pin_memory=True, num_workers=4)

    if self.load_weights:
      logging.info('loading saved weights')
      ml = 'cuda:{}'.format(self.gpu) if torch.cuda.is_available() else 'cpu'
      model.load_state_dict(torch.load('weights.pt', map_location = ml))
      logging.info('loaded saved weights')
    
    scheduler = torch.optim.lr_scheduler.CosineAnnealingLR(optimizer, float(self.epochs))

    valid_accs = []
    test_accs = []

    for epoch in range(self.epochs):
      logging.info('epoch %d lr %e', epoch, scheduler.get_lr()[0])
      model.drop_path_prob = self.drop_path_prob * epoch / self.epochs

      train_acc, train_obj = self.train(train_queue, model, criterion, optimizer)

      if self.validation_set:
        valid_acc, valid_obj = self.infer(valid_queue, model, criterion)
      else:
        valid_acc, valid_obj = 0, 0

      test_acc, test_obj = self.infer(test_queue, model, criterion, test_data=True)
      logging.info('train_acc: {:.4f}, valid_acc: {:.4f}, test_acc: {:.4f}'.format(train_acc, valid_acc, test_acc))


      if epoch in list(range(max(0, epochs - 5), epochs)):
        valid_accs.append((epoch, valid_acc))
        test_accs.append((epoch, test_acc))

      scheduler.step()
    self.count += 1

    return valid_accs, test_accs

  def train(self, train_queue, model, criterion, optimizer):
    objs = utils.AvgrageMeter()
    top1 = utils.AvgrageMeter()
    top5 = utils.AvgrageMeter()
    model.train()
    for step, (input, target) in enumerate(train_queue):
      device = torch.device('cuda:{}'.format(self.gpu) if torch.cuda.is_available() else 'cpu')
      input = input.to(device)
      target = target.to(device)

      optimizer.zero_grad()
      logits, logits_aux = model(input)
      loss = criterion(logits, target)
      if self.auxiliary:
        loss_aux = criterion(logits_aux, target)
        loss += self.auxiliary_weight*loss_aux
      loss.backward()
      nn.utils.clip_grad_norm_(model.parameters(), self.grad_clip)
      optimizer.step()

      prec1, prec5 = utils.accuracy(logits, target, topk=(1, 5))
      n = input.size(0)

      objs.update(loss.item(), n)
      top1.update(prec1.item(), n)
      top5.update(prec5.item(), n)  


    return top1.avg, objs.avg


  def infer(self, valid_queue, model, criterion, test_data=False):
    objs = utils.AvgrageMeter()
    top1 = utils.AvgrageMeter()
    top5 = utils.AvgrageMeter()
    model.eval()
    device = torch.device('cuda:{}'.format(self.gpu) if torch.cuda.is_available() else 'cpu')
    
    for step, (input, target) in enumerate(valid_queue):
      with torch.no_grad():
        input = input.to(device)
        target = target.to(device)

        logits, _ = model(input)
        loss = criterion(logits, target)

        prec1, prec5 = utils.accuracy(logits, target, topk=(1, 5))
        n = input.size(0)

        objs.update(loss.item(), n)
        top1.update(prec1.item(), n)
        top5.update(prec5.item(), n)


    return top1.avg, objs.avg
