# Supplementary material
Source: ML conference proceedings conference paper supplement (https://proceedings.mlr.press/v139/yan21c.html)
Supplement: Supplementary file 1 [file yan21c-supp.zip › supp/code/data_process/__init__.py]

from .dataLoader import Dataset

__all__ = ["Dataset"]
