# Supplementary material
Source: ML conference proceedings conference paper supplement (https://proceedings.mlr.press/v139/yan21c.html)
Supplement: Supplementary file 1 [file yan21c-supp.zip › supp/code/layers/__init__.py]

from .graphEncoder import PairWiseLearning
from .graphEncoder import GraphEncoder
from .loss import KLDivLoss

__all__ = ["PairWiseLearning", "KLDivLoss", "GraphEncoder"]
