# Supplementary material
Source: ML conference proceedings conference paper supplement (https://proceedings.mlr.press/v139/yan21c.html)
Supplement: Supplementary file 1 [file yan21c-supp.zip › supp/code/mylog/mylog.py]

from datetime import datetime
from time import time


class mylog(object):
    def __init__(self, logFile='log/logFile', fileOutput=True, screenOutput=True, reset=False):
        self.__st = time()
        self.__logFile = logFile
        self.__fileOutput = fileOutput
        self.__screenOutput = screenOutput
        if (reset):
            f = open(logFile, "w")

    def get_start(self):
        return self.__st

    def set_start(self, st):
        self.__st = st

    def reset(self):
        self.__st = time()

    def get_time(self):
        return time() - self.__st

    def set_fileOutput(self, fileOutput):
        self.__fileOutput = fileOutput

    def set_screenOutput(self, screenOutput):
        self.__screenOutput = screenOutput

    def set_logFile(self, logFile):
        self.__logFile = logFile

    def log(self, msg, fileOutput=None, screenOutput=None):
        if fileOutput == None:
            fileOutput = self.__fileOutput
        if screenOutput == None:
            screenOutput = self.__screenOutput

        currentTime = self.get_time()

        if fileOutput == True:
            f = open(self.__logFile, "a+", encoding='utf-8')
            f.write(str(datetime.now()) + ' : ' + msg + '\n')
            f.close()

        if screenOutput == True:
            print("%15.4f" % currentTime, ':', msg)
