# Supplementary material
Source: ML conference proceedings conference paper supplement (https://proceedings.mlr.press/v139/yan21c.html)
Supplement: Supplementary file 1 [file yan21c-supp.zip › supp/code/parallel/__init__.py]

from .parallel import DataParallelModel, DataParallelCriterion

__all__ = ["DataParallelModel", "DataParallelCriterion"]
