# Supplementary material
Source: ML conference proceedings conference paper supplement (https://proceedings.mlr.press/v139/yan21c.html)
Supplement: Supplementary file 1 [file yan21c-supp.zip › supp/code/preprocessing/gen_json_oo_train.py]

# Copyright 2019 The Google Research Authors.
#
# Licensed under the Apache License, Version 2.0 (the "License");
# you may not use this file except in compliance with the License.
# You may obtain a copy of the License at
#
#     http://www.apache.org/licenses/LICENSE-2.0
#
# Unless required by applicable law or agreed to in writing, software
# distributed under the License is distributed on an "AS IS" BASIS,
# WITHOUT WARRANTIES OR CONDITIONS OF ANY KIND, either express or implied.
# See the License for the specific language governing permissions and
# limitations under the License.

"""Runnable example, as shown in the README.md."""

from __future__ import absolute_import
from __future__ import division
from __future__ import print_function

from absl import app
from nasbench import api
from random import randint
import json
import numpy as np
from collections import OrderedDict

# Replace this string with the path to the downloaded nasbench.tfrecord before
# executing.
NASBENCH_TFRECORD = 'data/nasbench_only108.tfrecord'

INPUT = 'input'
OUTPUT = 'output'
CONV1X1 = 'conv1x1-bn-relu'
CONV3X3 = 'conv3x3-bn-relu'
MAXPOOL3X3 = 'maxpool3x3'


# def main(argv):
#   del argv  # Unused
#
#   # Load the data from file (this will take some time)
#   nasbench = api.NASBench(NASBENCH_TFRECORD)
#
#   # Create an Inception-like module (5x5 convolution replaced with two 3x3
#   # convolutions).
#   model_spec = api.ModelSpec(
#       # Adjacency matrix of the module
#       matrix=[[0, 1, 1, 1, 0, 1, 0],    # input layer
#               [0, 0, 0, 0, 0, 0, 1],    # 1x1 conv
#               [0, 0, 0, 0, 0, 0, 1],    # 3x3 conv
#               [0, 0, 0, 0, 1, 0, 0],    # 5x5 conv (replaced by two 3x3's)
#               [0, 0, 0, 0, 0, 0, 1],    # 5x5 conv (replaced by two 3x3's)
#               [0, 0, 0, 0, 0, 0, 1],    # 3x3 max-pool
#               [0, 0, 0, 0, 0, 0, 0]],   # output layer
#       # Operations at the vertices of the module, matches order of matrix
#       ops=[INPUT, CONV1X1, CONV3X3, CONV3X3, CONV3X3, MAXPOOL3X3, OUTPUT])
#
#   # Query this model from dataset, returns a dictionary containing the metrics
#   # associated with this model.
#   print('Querying an Inception-like model.')
#   data = nasbench.query(model_spec)
#   print(data)
#   print(nasbench.get_budget_counters())   # prints (total time, total epochs)
#
#   # Get all metrics (all epoch lengths, all repeats) associated with this
#   # model_spec. This should be used for dataset analysis and NOT for
#   # benchmarking algorithms (does not increment budget counters).
# #  print('\nGetting all metrics for the same Inception-like model.')
# #  fixed_metrics, computed_metrics = nasbench.get_metrics_from_spec(model_spec)
# #  print(fixed_metrics)
# #  for epochs in nasbench.valid_epochs:
# #    for repeat_index in range(len(computed_metrics[epochs])):
# #      data_point = computed_metrics[epochs][repeat_index]
# #      print('Epochs trained %d, repeat number: %d' % (epochs, repeat_index + 1))
# #      print(data_point)
#
#   # Iterate through unique models in the dataset. Models are unqiuely identified
#   # by a hash.
#   i = 0
#   for unique_hash in nasbench.hash_iterator():
#     fixed_metrics, computed_metrics = nasbench.get_metrics_from_hash(unique_hash)
#     print('\nIterating over {} / {} unique models in the dataset.'.format(i, 423624))
#     print(fixed_metrics)
#     for epochs in nasbench.valid_epochs:
#         for repeat_index in range(len(computed_metrics[epochs])):
#             data_point = computed_metrics[epochs][repeat_index]
#             print('Epochs trained %d, repeat number: %d' % (epochs, repeat_index + 1))
#             print(data_point)
#     i += 1


def gen_data_point(nasbench):

    i = 0
    epoch = 108

    for unique_hash in nasbench.hash_iterator():
        fixed_metrics, computed_metrics = nasbench.get_metrics_from_hash(unique_hash)
        print('\nIterating over {} / {} unique models in the dataset.'.format(i, 423623))
        test_acc_avg = 0.0
        training_time = 0.0
        for repeat_index in range(len(computed_metrics[epoch])):
            assert len(computed_metrics[epoch])==3, 'len(computed_metrics[epoch]) should be 3'
            data_point = computed_metrics[epoch][repeat_index]
            #print('Epochs trained %d, repeat number: %d' % (epoch, repeat_index + 1))
            #print(data_point)
            test_acc_avg += data_point['final_test_accuracy']
            training_time += data_point['final_training_time']
        test_acc_avg = test_acc_avg/3.0
        training_time_avg = training_time/3.0
        random_repeat_index = randint(0, 2)
        val_acc_sample = computed_metrics[epoch][random_repeat_index]['final_validation_accuracy']
        adj_array = fixed_metrics['module_adjacency']
        params = fixed_metrics['trainable_parameters']
        num_edges = np.sum(adj_array)
        adj_array = adj_array.tolist()
        if len(adj_array) == 7 or num_edges > 7:
            continue
        print(adj_array)
        ops_array = transform_operations(fixed_metrics['module_operations'])
        print(ops_array)
        model_spec = api.ModelSpec(fixed_metrics['module_adjacency'], fixed_metrics['module_operations'])
        data = nasbench.query(model_spec, epochs=108)
        print('api training time: {}'.format(data['training_time']))
        print('real training time: {}'.format(training_time_avg))

        yield {i:
                   {'test_accuracy': test_acc_avg,
                    'validation_accuracy':val_acc_sample,
                    'module_adjacency':adj_array,
                    'module_operations': ops_array.tolist(),
                    'parameters': params,
                    'training_time': training_time_avg}}

        i += 1

def transform_operations(ops):
    transform_dict =  {'input':0, 'conv1x1-bn-relu':1, 'conv3x3-bn-relu':2, 'maxpool3x3':3, 'output':4}
    ops_array = np.zeros([6,5], dtype='int8')
    for row, op in enumerate(ops):
        col = transform_dict[op]
        ops_array[row, col] = 1
    return ops_array


def gen_json_file():
    nasbench = api.NASBench(NASBENCH_TFRECORD)
    nas_gen = gen_data_point(nasbench)
    data_dict = OrderedDict()
    for data_point in nas_gen:
        data_dict.update(data_point)
    with open('data/nasbench101_oo_train.json', 'w') as outfile:
        json.dump(data_dict, outfile)


# If you are passing command line flags to modify the default config values, you
# must use app.run(main)
if __name__ == '__main__':
  #app.run(main)
    gen_json_file()
