# Supplementary material
Source: ML conference proceedings conference paper supplement (https://proceedings.mlr.press/v139/yan21c.html)
Supplement: Supplementary file 1 [file yan21c-supp.zip › supp/code/requirements.txt]

transformers==4.6.1
torch==1.8.1
torchvision==0.9.1
thop
click
Cython
ConfigSpace==0.4.18
autograd>=1.3
emcee==3.0.2
ipython
lightgbm>=2.3.1
matplotlib
numpy==1.20.3
pandas
pathvalidate
Pillow>=7.1.2
psutil
scikit-image
scikit-learn>=0.23.1
scipy
seaborn
statsmodels
tensorboard==1.15.0
tensorflow-gpu==1.15.0
tensorflow-estimator
tqdm==4.31.1
networkx==2.2
graphviz==0.14.2
