# Supplementary material
Source: ML conference proceedings conference paper supplement (https://proceedings.mlr.press/v139/yan21c.html)
Supplement: Supplementary file 1 [file yan21c-supp.zip › supp/code/run.py]

import gc
import time
import torch
import numpy as np
from parallel import DataParallelModel, DataParallelCriterion
from mylog import mylog
from parameterLoader import argLoader
from data_process import Dataset
from layers import PairWiseLearning, KLDivLoss
from utils import prepare_train as prepare_func
from utils import save_check_point
from transformers import AdamW
from transformers import get_linear_schedule_with_warmup

LOG = mylog(reset=False)

def train(config):
    # Model
    net = PairWiseLearning(config)
    lossFunc = KLDivLoss(config)

    if torch.cuda.is_available():
        net = net.cuda(config.device)
        lossFunc = lossFunc.cuda(config.device)

        if config.parallel:
            net = DataParallelModel(net)
            lossFunc = DataParallelCriterion(lossFunc)

    # Data
    trainSet = Dataset("train", config, LOG, prepare_func)
    validSet = Dataset("valid", config, LOG, prepare_func)
    print(len(trainSet), len(validSet))

    # Learning Parameters
    num_batches_per_epoch = len(trainSet)
    learning_rate = config.learning_rate

    # Optimizer
    no_decay = ["bias", "LayerNorm.weight"]
    optimizer_grouped_parameters = [
        {
            "params": [p for n, p in net.named_parameters() if not any(nd in n for nd in no_decay)],
            "weight_decay": config.weight_decay,
        },
        {"params": [p for n, p in net.named_parameters() if any(nd in n for nd in no_decay)], "weight_decay": 0.0},
    ]

    optimizer = AdamW(optimizer_grouped_parameters, lr=learning_rate, eps=config.adam_epsilon)
    scheduler = get_linear_schedule_with_warmup(
        optimizer, num_warmup_steps=config.warmup_steps, num_training_steps=num_batches_per_epoch * config.max_epoch
    )
    optimizer.zero_grad()

    ticks = 0
    Q = []
    best_vloss = 1e99

    LOG.log("There are %d batches per epoch" % (len(trainSet)))
    for epoch_idx in range(config.max_epoch):
        trainSet.batchShuffle()
        LOG.log("Batch Shuffled")
        for batch_idx, batch_data in enumerate(trainSet):
            net.train()
            # release memory
            if (ticks + 1) % 1000 == 0:
                gc.collect()

            start_time = time.time()
            ticks += 1

            X, maskX, maskX_, Y, maskY, maskY_, maskXY, labels = batch_data
            logits = net(X, maskX, maskX_, Y, maskY, maskY_, maskXY)
            n_token = int((labels.data != config.PAD).data.sum())
            loss = lossFunc(logits, labels, n_token).sum()

            Q.append(float(loss))
            if len(Q) > 200:
                Q.pop(0)
            loss_avg = sum(Q) / len(Q)

            loss.backward()

            optimizer.step()
            scheduler.step()
            optimizer.zero_grad()

            LOG.log('Epoch %2d, Batch %6d, Loss %9.6f, Average Loss %9.6f, Time %9.6f' %
                    (epoch_idx + 1, batch_idx + 1, loss, loss_avg, time.time() - start_time))

            loss = None

            if (ticks >= config.check_point_min) and (ticks % config.check_point_freq == 0):
                gc.collect()
                vloss = 0
                total_tokens = 0
                with torch.no_grad():
                    net.eval()
                    for bid, batch_data in enumerate(validSet):
                        X, maskX, maskX_, Y, maskY, maskY_, maskXY, labels = batch_data
                        logits = net(X, maskX, maskX_, Y, maskY, maskY_, maskXY)
                        nv_token = int((labels.data != config.PAD).data.sum())
                        total_tokens += nv_token
                        vloss += float(lossFunc(logits, labels, n_token).sum())

                vloss /= total_tokens
                is_best = vloss < best_vloss
                best_vloss = min(vloss, best_vloss)
                LOG.log('CheckPoint: Validation Loss %11.8f, Best Loss %11.8f' % (vloss, best_vloss))
                vloss = None

                if is_best:
                    LOG.log('Best Model Updated')
                    save_check_point({
                        'epoch': epoch_idx + 1,
                        'batch': batch_idx + 1,
                        'config': config,
                        'state_dict': net.state_dict(),
                        'best_vloss': best_vloss},
                        is_best,
                        path=config.save_path,
                        fileName=config.dataset + '_latest.pth.tar',
                        dataset=config.dataset
                    )

        if config.save_each_epoch:
            LOG.log('Saving Model after %d-th Epoch.' % (epoch_idx + 1))
            save_check_point({
                'epoch': epoch_idx + 1,
                'batch': batch_idx + 1,
                'config': config,
                'state_dict': net.state_dict(),
                'optimizer': optimizer.state_dict(),
                'scheduler': scheduler.state_dict(),
                'best_vloss': 1e99},
                False,
                path=config.save_path,
                fileName=config.dataset + '_checkpoint_Epoch' + str(epoch_idx + 1) + '.pth.tar',
                dataset=config.dataset
            )

        LOG.log('Epoch Finished.')
        gc.collect()


if __name__ == '__main__':
    args = argLoader()
    print("Totally", torch.cuda.device_count(), "GPUs are available.")
    if args.parallel:
        print("Using data parallel.")
        for device in range(torch.cuda.device_count()):
            print("Using #", device, "named", torch.cuda.get_device_name(device), "with", (
                        torch.cuda.get_device_properties(device).total_memory - torch.cuda.memory_allocated(
                    device)) // 1000 // 1000 / 1000, "GB Memory available.")
    else:
        torch.cuda.set_device(args.device)
        print("Using #", args.device, "named", torch.cuda.get_device_name(args.device), (
                    torch.cuda.get_device_properties(args.device).total_memory - torch.cuda.memory_allocated(
                args.device)) // 1000 // 1000 / 1000, "GB Memory available.")

    if args.do_train:
        train(args)
