# Supplementary material
Source: ML conference proceedings conference paper supplement (https://proceedings.mlr.press/v139/yan21c.html)
Supplement: Supplementary file 1 [file yan21c-supp.zip › supp/code/run_scripts/generate_oo.sh]

#!/usr/bin/env bash
python preprocessing/gen_json_oo_train.py
python preprocessing/gen_json_oo_test.py
