# Supplementary material
Source: ML conference proceedings conference paper supplement (https://proceedings.mlr.press/v139/yan21c.html)
Supplement: Supplementary file 1 [file yan21c-supp.zip › supp/code/run_scripts/pretrain_nasbench101.sh]

#!/usr/bin/env bash
export CUDA_VISIBLE_DEVICES=0

python run.py --do_train --parallel --train_data data/nasbench101/train_data.pt --train_pair data/nasbench101/train_pair_k2_d2000000_metric_params.pt  --valid_data data/nasbench101/test_data.pt --valid_pair data/nasbench101/test_pair_k2_d2000000_metric_params.pt --dataset nasbench101 --n_vocab 5
