# Supplementary material
Source: ML conference proceedings conference paper supplement (https://proceedings.mlr.press/v139/yan21c.html)
Supplement: Supplementary file 1 [file yan21c-supp.zip › supp/code/run_scripts/pretrain_nasbench301.sh]

#!/usr/bin/env bash
export CUDA_VISIBLE_DEVICES=0

python run.py --do_train --parallel --train_data data/nasbench301/train_data.pt --train_pair data/nasbench301/train_pair_k1_d5000000_metric_flops.pt  --valid_data data/nasbench301/test_data.pt --valid_pair data/nasbench301/test_pair_k1_d5000000_metric_flops.pt --dataset nasbench301 --n_vocab 11
