# Supplementary material
Source: ML conference proceedings conference paper supplement (https://proceedings.mlr.press/v139/yan21c.html)
Supplement: Supplementary file 1 [file yan21c-supp.zip › supp/code/utils/__init__.py]

from .utils import prepare_train
from .IO import save_check_point

__all__ = ["prepare_train", "save_check_point"]
