# Supplementary material
Source: ML conference proceedings conference paper supplement (https://proceedings.mlr.press/v139/yan21c.html)

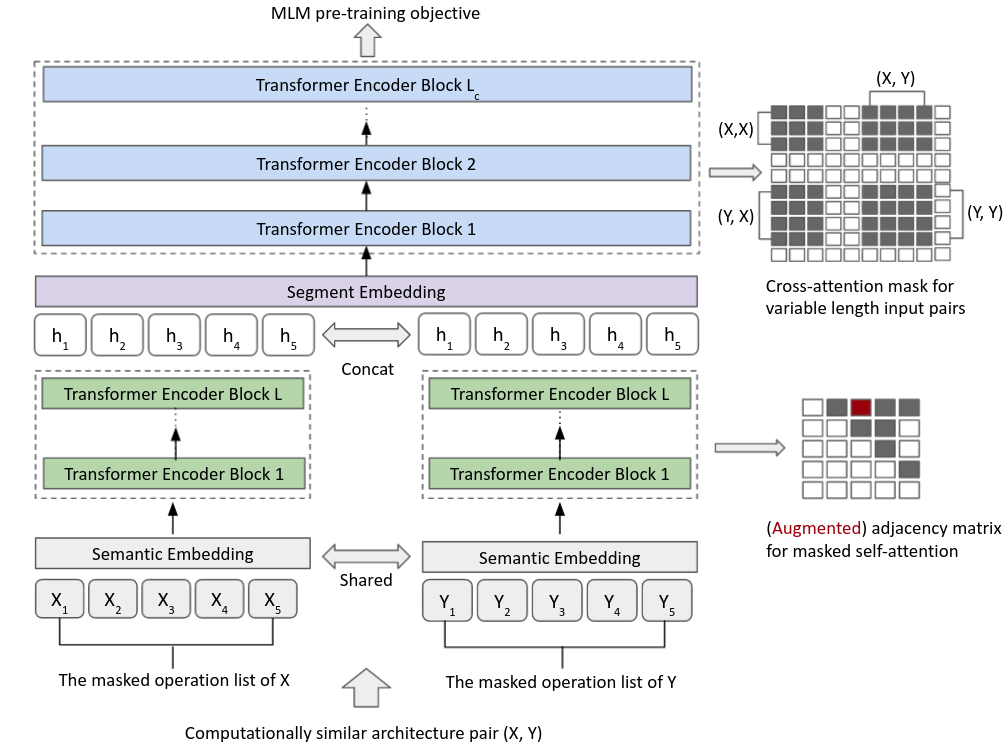

Supplement: Supplementary file 1 [file yan21c-supp.zip › supp/code/docs/cate_img.png]
